# Supplementary material
Source: PubMed Central journal article supplement (PMC5119028)
Supplement: AAC.01751-16_zac012165784so1.pdf [file AAC.01751-16_zac012165784so1.pdf]

**MRSA WORKUP**

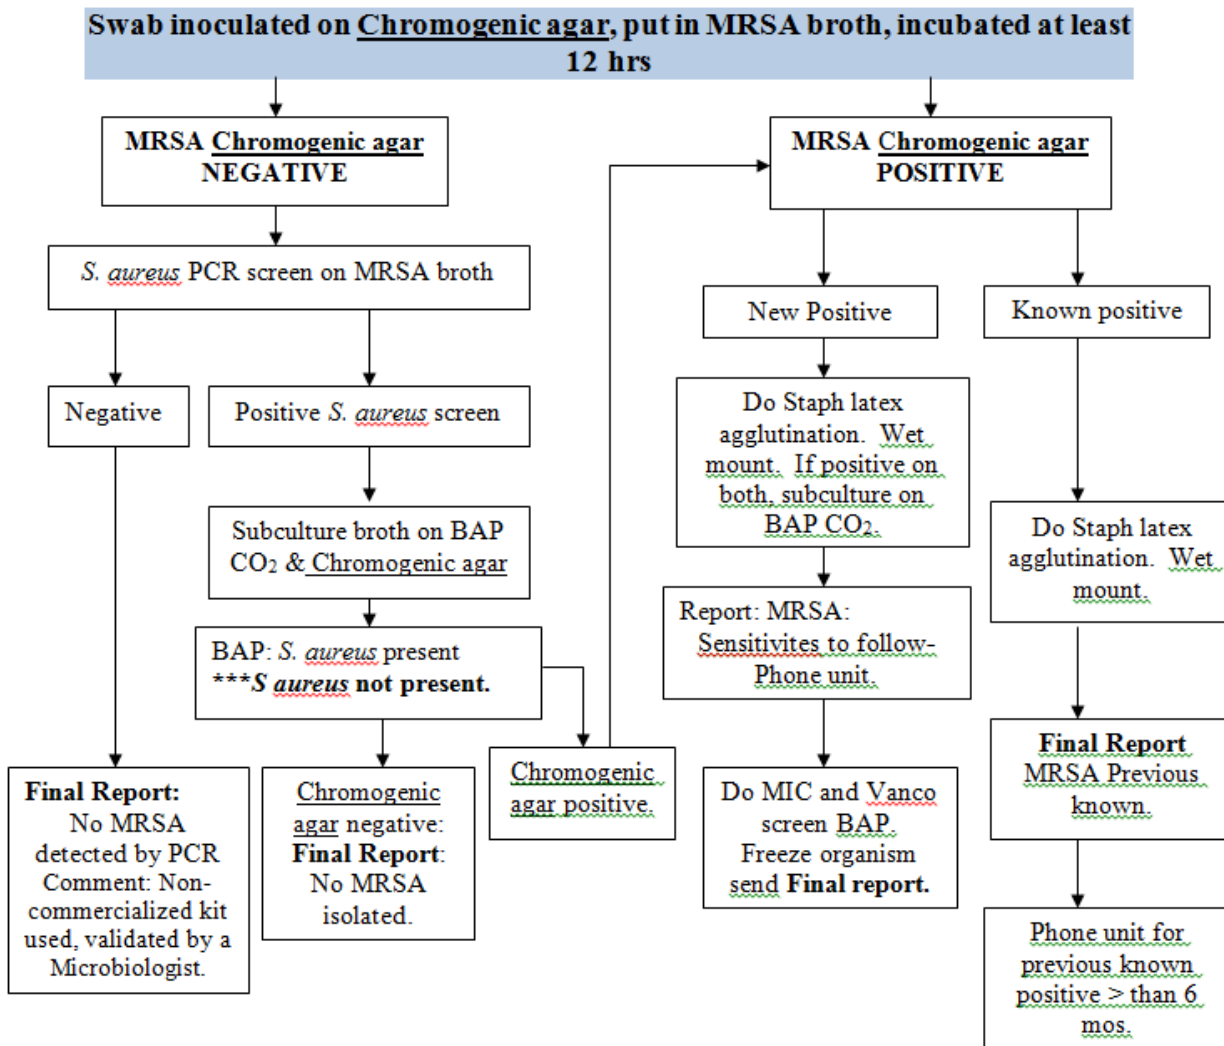

BAP: Blood Agar Plate

MIC: Minimum Inhibitory Concentration

Supplement 2:  
*PCR Primers and Probes*

| Name                    | MW<br>Free acid | Tm   | □g/OD | Sequence (5'-3')                                                  |
|-------------------------|-----------------|------|-------|-------------------------------------------------------------------|
| SA-F                    | 7014.7          | 56.5 | 31.2  | GTC GGT ACA CGA TAT TCT TCA CG                                    |
| SA-RR                   | 7279.8          | 59.7 | 32.5  | CTC TCG TAT GAC CAG CTT CGG TAC                                   |
| SA-HP-1                 | 8875.9          | 62.7 | 29.7  | 5' TAC TGA AAT CTC ATT ACG TTG CAT<br>CGG AA X                    |
| SCREEN<br>SA-HP-2       | 8928.9          | 60.9 | 30.9  | <b>5' LC Red 640</b> -ATT GTG TTC TGT ATG TAA<br>AAG CCG TCT TG p |
| CONFIRMATION<br>SA-HP-2 | 8928.9          | 60.9 | 30.9  | <b>5' LC Red 670</b> -ATT GTG TTC TGT ATG TAA<br>AAG CCG TCT TG p |
| Lambda FL               | 7288.9          | 65.1 | 31.6  | 5' GGT GCC GTT CAC TTC CCG AAT AAC X                              |
| Lambda 705              | 8001.3          | 64.9 | 30.3  | <b>5' LC Red 670</b> CGG ATA TTT TTG<br>ATC TGA CCG AAG CG p      |
| MEC- HP-1               | 8990            | 62.8 | 28.3  | 5' CAG GTT ACG GAC AAG GTG AAA TAC<br>TGA TTX                     |
| MEC-HP-2                | 9110.1          | 61.6 | 30.4  | <b>5' LC 640</b> ACC CAG TAC AGA TCC TTT CAA<br>TCT ATA GCG p     |
| MEC-S                   | 7432            | 53.3 | 28.9  | CTA GGT GTT GGT GAA GAT ATA CCA                                   |
| MEC-A                   | 6476.3          | 56.9 | 29.9  | TGA GGT GTG TTA ATA TTG CCA                                       |

*PCR Interpretation*

| <i>S. aureus</i><br>Screen | SAR | Lambda | Result                 | Follow up                               |
|----------------------------|-----|--------|------------------------|-----------------------------------------|
|                            | POS | POS    | SAR                    | Subculture broth as per MRSA workup     |
|                            | POS | NEG    | SAR                    | Subculture broth as per MRSA workup     |
|                            | NEG | POS    | NO SAR                 | Send No MRSA report, as per MRSA workup |
|                            | NEG | NEG    | (Nonspecific reaction) | Subculture broth as per MRSA workup     |
| MRSA<br>Confirmation       | SAR | MEC    | Result                 | Follow up                               |
|                            | POS | POS    | MRSA                   | Report MRSA POS, as per MRSA workup     |
|                            | POS | NEG    | SAR                    | Send No MRSA report, as per MRSA workup |
|                            | NEG | NEG    | NOT MRSA               | Send No MRSA report, as per MRSA workup |

Supplement 3

Formulas used to draw the graphs

$$PPV = \frac{\textit{sensitivity} * \textit{prevalence}}{\textit{sensitivity} * \textit{prevalence} + (1 - \textit{specificity}) * (1 - \textit{prevalence})}$$

$$NPV = \frac{\textit{specificity} * (1 - \textit{prevalence})}{\textit{specificity} * (1 - \textit{prevalence}) + (1 - \textit{sensitivity}) * \textit{prevalence}}$$
